# Supplementary material for: Aim and shoot: molecule-imprinting polymer coated MoO3 for selective SERS detection and photocatalytic destruction of low-level organic contaminants
Source: Royal Society of Chemistry journal article supplement (doi:10.1039/c7ra05547a), 2017-01-01
Supplement: c7ra05547a1.pdf [file c7ra05547a1.pdf]

## Supporting Information

# *Aim and Shoot*: Molecule-Imprinting Polymer Coated MoO<sub>3</sub> for Selective SERS Detection and Photocatalytic Destruction of Low-Level Organic Contaminants

*Lingzhi, Wang, Yin Xu, Xianjun Tan, Sen Tapas, and Jinlong Zhang\**

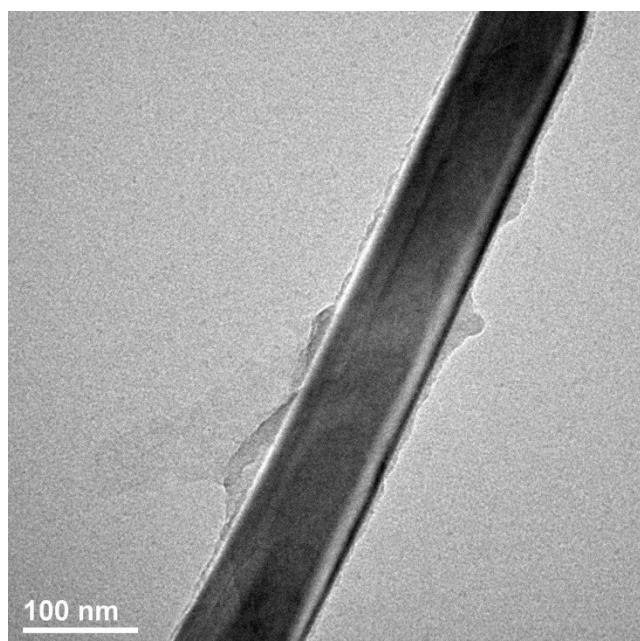

**Fig S1.** TEM images of MoO<sub>3</sub>@MIPs prepared without HNO<sub>3</sub> pre-treatment.

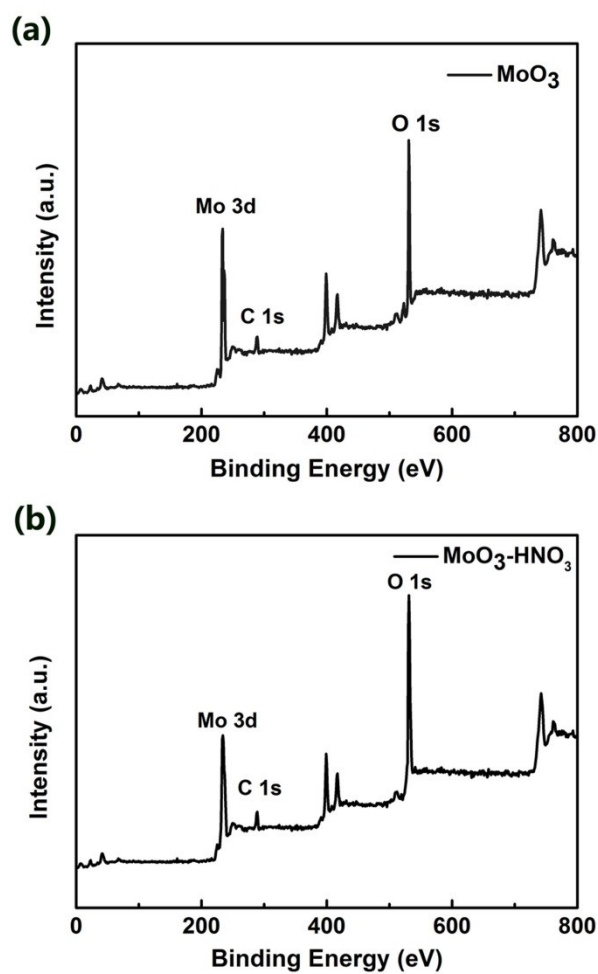

**Fig S2.** XPS spectra of MoO<sub>3</sub> nanorods before (a) and after treating with HNO<sub>3</sub> (b).

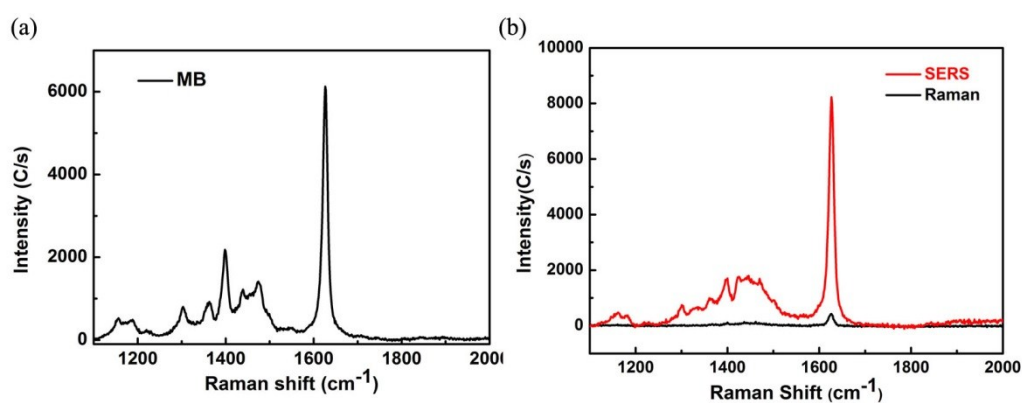

**Figure S3.** The standard curve of MB (a); SERS spectra of 10<sup>-5</sup> M MB on MoO<sub>3</sub>@MIPs substrate, and Raman spectra of 10<sup>-2</sup> M MB on glass slide (b).

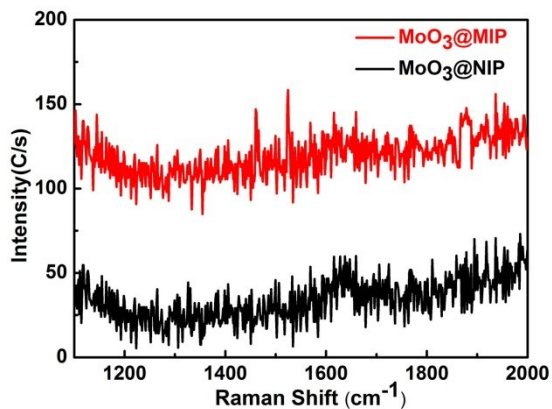

**Fig S4.** SERS spectra of  $10^{-6}$  M CV on MoO<sub>3</sub>@MIPs and MoO<sub>3</sub>@NIPs.

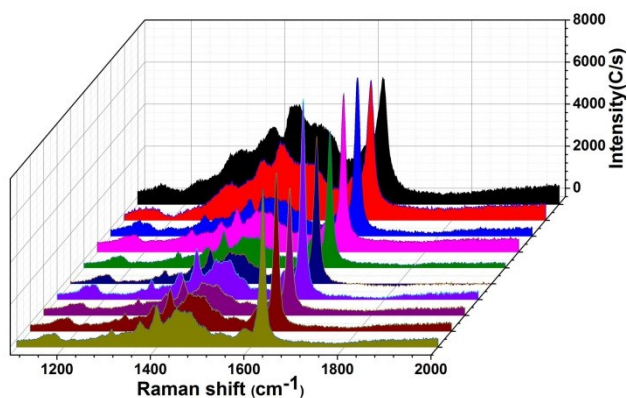

**Fig S5.** SERS spectra of  $10^{-5}$  M MB/CV mixture obtained from 10 different sites on the same substrate.

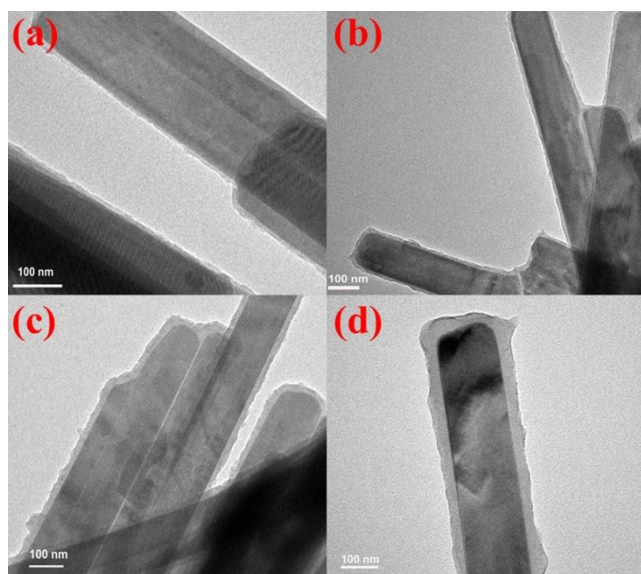

**Fig S6.** TEM micrographs of MoO<sub>3</sub>@MIPs with different thickness of molecularly imprinted polymers layer.
